# Supplementary material
Source: MDPI journal article supplement (https://www.mdpi.com/2227-9717/10/8/1635)
Supplement: s1 [file s1]

# Supporting Information

## **Effects of sulfur and mineral elements (Ca, Al, Si and Fe) on thermochemical behaviors of zinc during co-pyrolysis of coal and waste tire: a combined experimental and thermodynamic simulation study**

Yaxin Lan<sup>a</sup>, Shuangling Jin<sup>a\*</sup>, Jitong Wang<sup>b</sup>, Xiaorui Wang<sup>a</sup>, Rui Zhang<sup>a</sup>, Licheng Ling<sup>b</sup>, Minglin Jin<sup>a\*</sup>

*<sup>a</sup>School of Materials Science and Engineering, Shanghai Institute of Technology, Shanghai, 201418, China*

*<sup>b</sup>State Key Laboratory of Chemical Engineering, East China University of Science and Technology, Shanghai, 200237, China*

---

\*Corresponding authors. E-mail addresses: jinshuangling@sit.edu.cn (S. Jin), jml@sit.edu.cn (M. Jin).

**Table S1. Mass distributions of Zn in the pyrolytic products.**

| Sample          | Sample weight before pyrolysis (g) | Total Zn in sample (g) | Pyrolysis temperature (°C) | Generated coke (g) | Zn in coke (g)        | Zn in tar (g)         | Zn in gas (g)         |
|-----------------|------------------------------------|------------------------|----------------------------|--------------------|-----------------------|-----------------------|-----------------------|
| WT-2            | 10.0000                            | 0.2131                 | 700                        | 3.7334             | 0.1881                | 0.0244                | $6.12 \times 10^{-4}$ |
| Coal+3wt.% WT-2 | 9.9770                             | 0.00759                |                            | 7.5714             | 0.0074                | $1.82 \times 10^{-4}$ | $1.70 \times 10^{-5}$ |
| Coal+5wt.% WT-2 | 9.9851                             | 0.01182                |                            | 7.5145             | 0.0115                | $2.19 \times 10^{-4}$ | $9.81 \times 10^{-5}$ |
| Coal+1wt.% ZnO  | 9.9887                             | 0.08139                |                            | 7.7530             | 0.0788                | 0.0024                | $1.97 \times 10^{-4}$ |
| Coal+5wt.% ZnO  | 9.9828                             | 0.40173                |                            | 7.7075             | 0.3627                | 0.0389                | $1.31 \times 10^{-4}$ |
| WT-2            | 10.0000                            | 0.2131                 | 900                        | 3.4744             | 0.0856                | 0.1268                | $6.5 \times 10^{-4}$  |
| Coal+3wt.% WT-2 | 9.9671                             | 0.00758                |                            | 7.3600             | $8.96 \times 10^{-4}$ | 0.0066                | $5.75 \times 10^{-5}$ |
| Coal+5wt.% WT-2 | 9.9834                             | 0.01182                |                            | 7.2507             | $6.14 \times 10^{-4}$ | 0.0112                | $4.75 \times 10^{-5}$ |
| Coal+1wt.% ZnO  | 9.9901                             | 0.08140                |                            | 7.4327             | 0.0255                | 0.0556                | $2.84 \times 10^{-4}$ |
| Coal+5wt.% ZnO  | 9.0050                             | 0.36238                |                            | 6.5896             | 0.1845                | 0.1775                | $3.34 \times 10^{-4}$ |
| WT-2            | 9.9996                             | 0.2131                 | 1050                       | 3.3162             | 0.0001                | 0.2111                | 0.0019                |
| Coal+3wt.% WT-2 | 9.9858                             | 0.00759                |                            | 7.2754             | 0.0012                | 0.0064                | $2.33 \times 10^{-5}$ |
| Coal+5wt.% WT-2 | 9.9916                             | 0.01183                |                            | 7.2017             | 0.0016                | 0.0102                | $3.70 \times 10^{-5}$ |
| Coal+1wt.% ZnO  | 9.9855                             | 0.08137                |                            | 7.3796             | 0.0192                | 0.0617                | $3.95 \times 10^{-4}$ |
| Coal+5wt.% ZnO  | 9.9631                             | 0.40094                |                            | 7.0351             | 0.0389                | 0.3610                | $9.94 \times 10^{-4}$ |

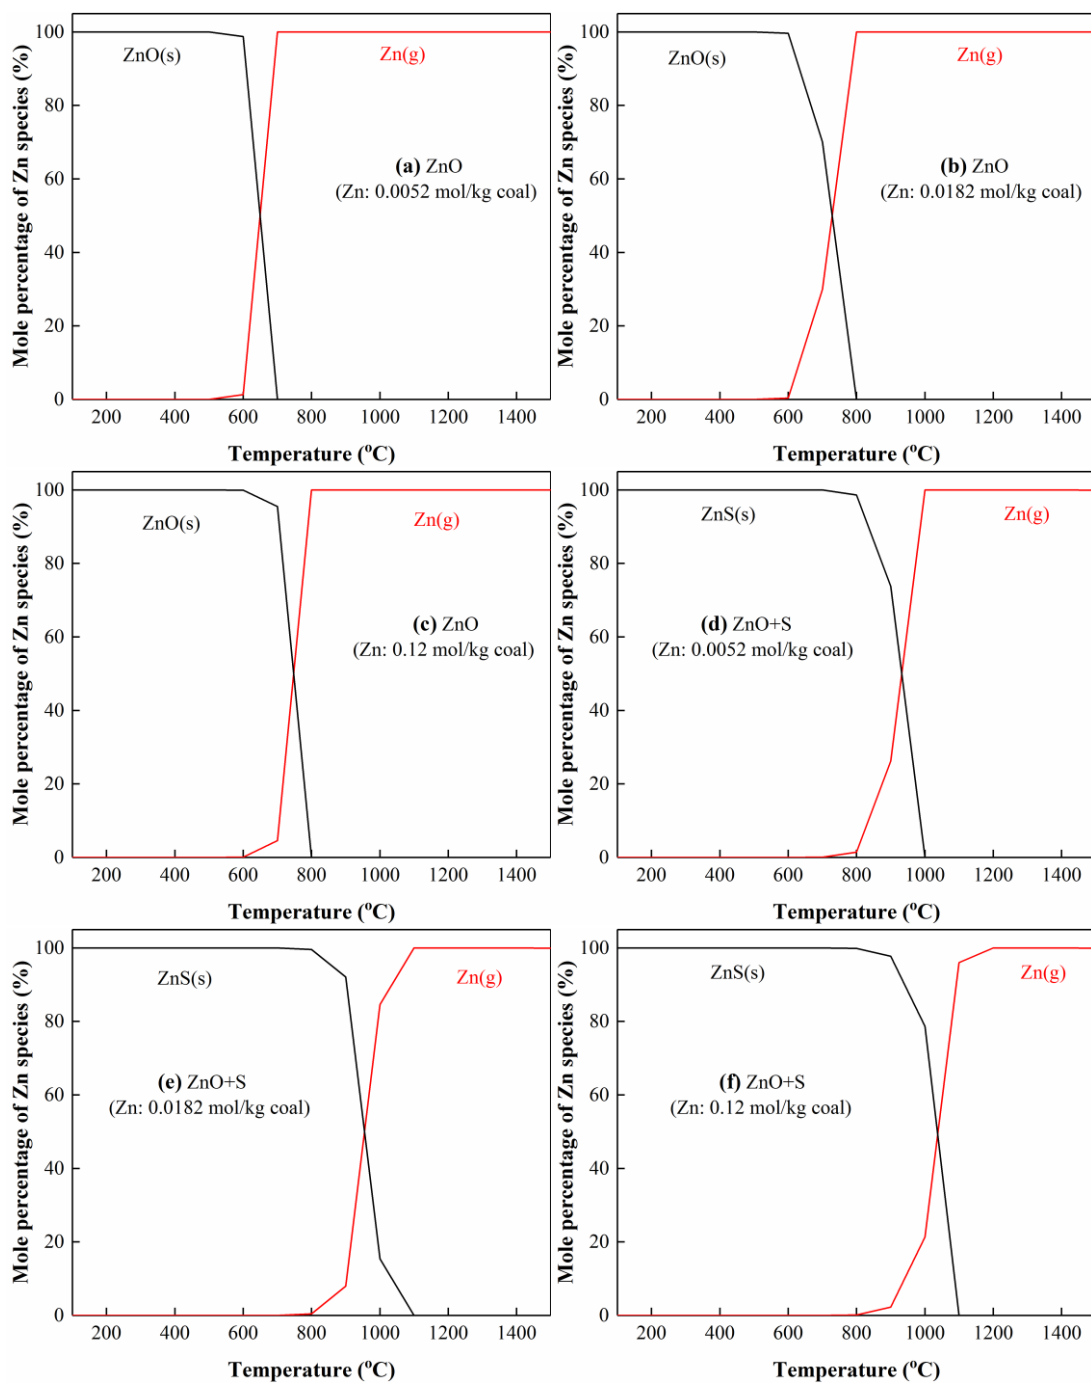

**Figure S1. Thermodynamic equilibrium distributions of zinc when sulfur and zinc coexist in the coal.**

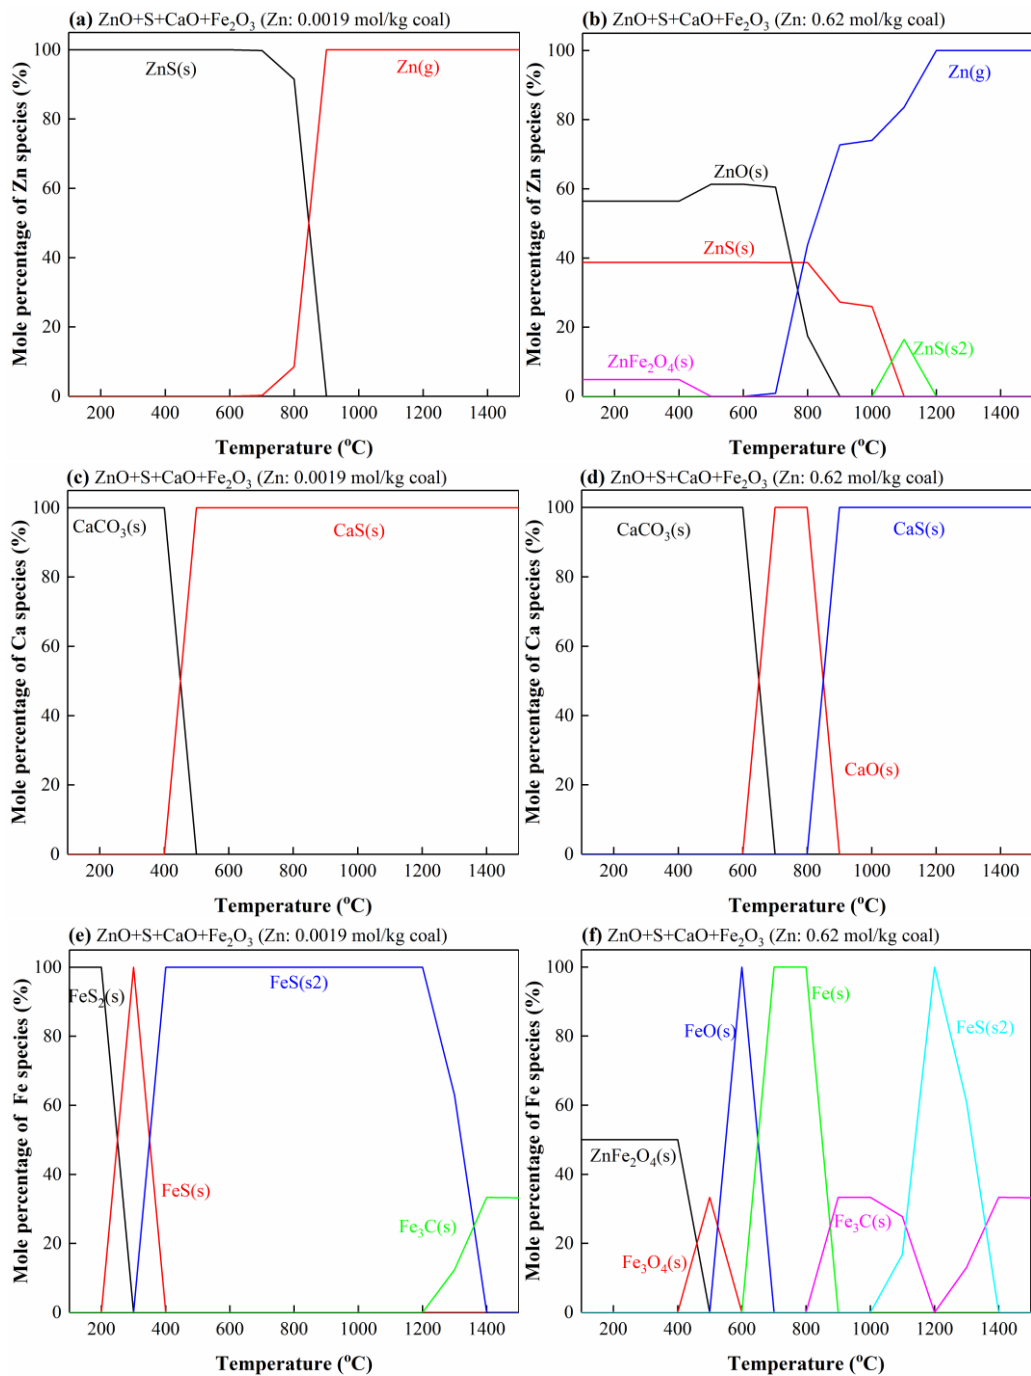

**Figure S2.** The thermodynamic equilibrium distributions of zinc (a, b), calcium (c, d) and iron (e, f) when sulfur, zinc, calcium and iron coexist in the system.

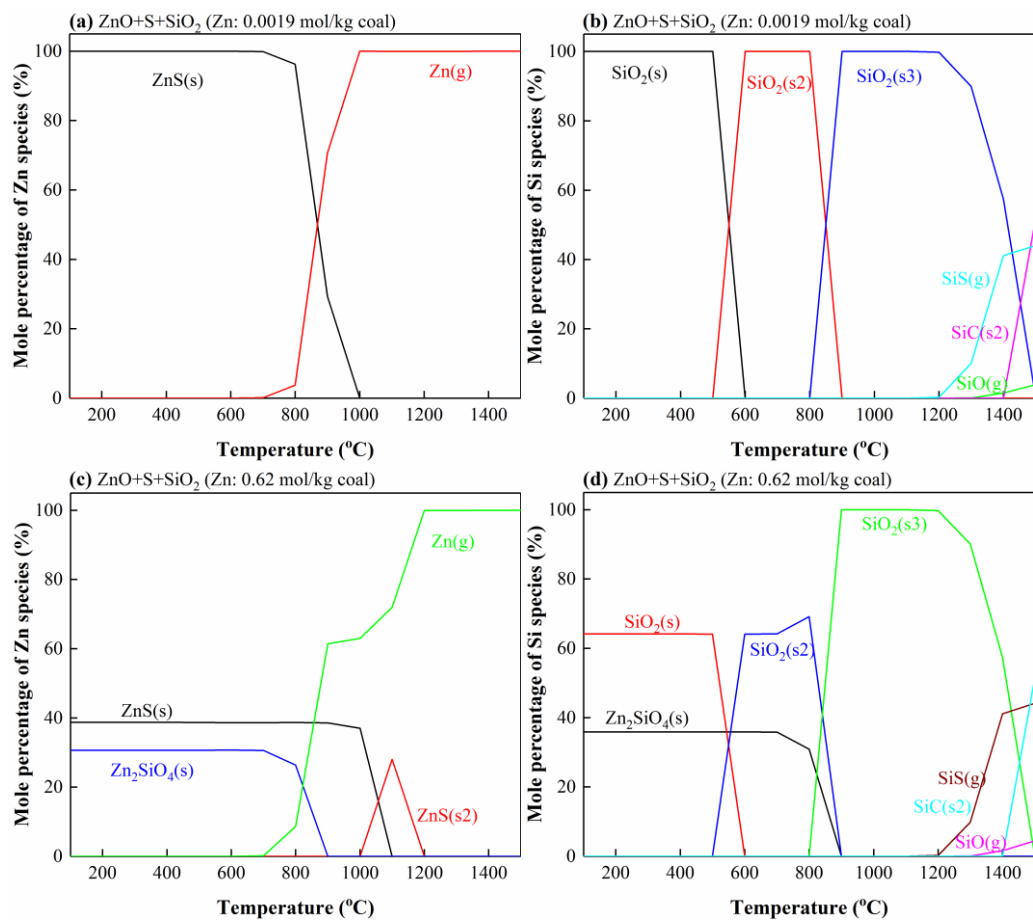

**Figure S3. The thermodynamic equilibrium distributions of zinc (a, c) and silicon (b, d) when sulfur, zinc and silicon coexist in the system.**

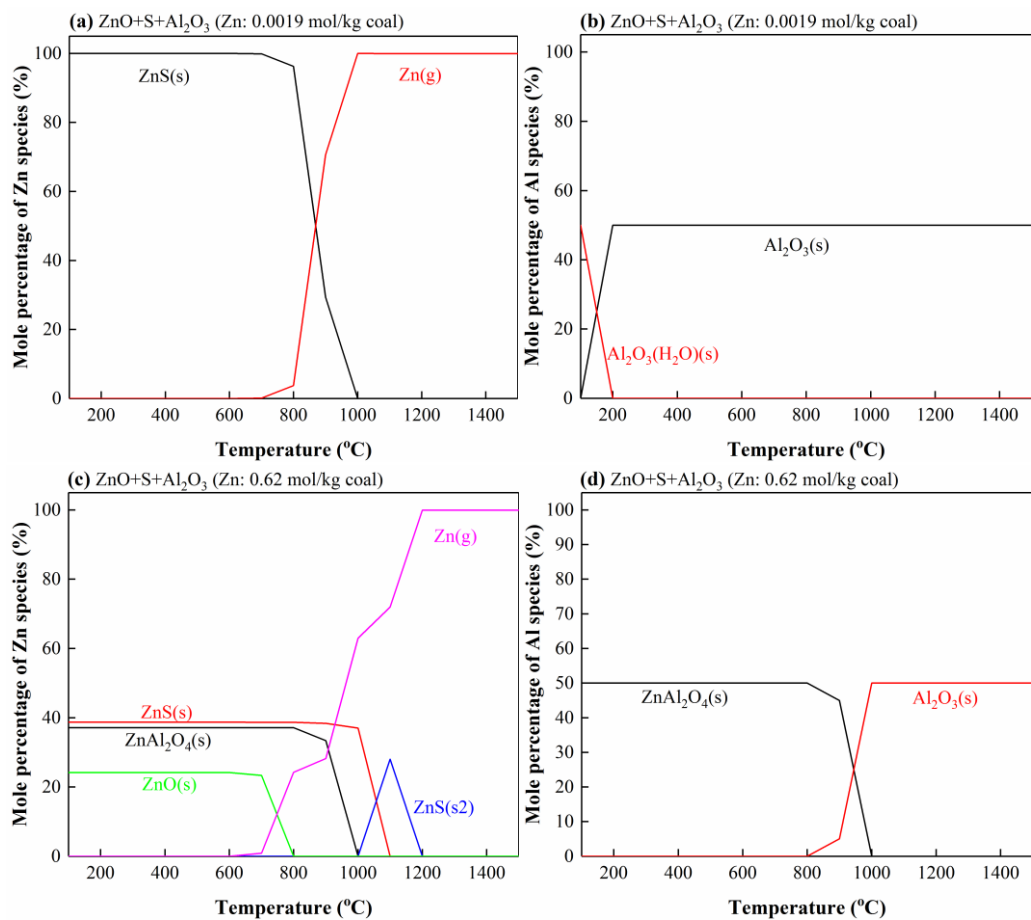

**Figure S4. The thermodynamic equilibrium distributions of zinc (a, c) and aluminum (b, d) when sulfur, zinc and aluminum coexist in the system.**

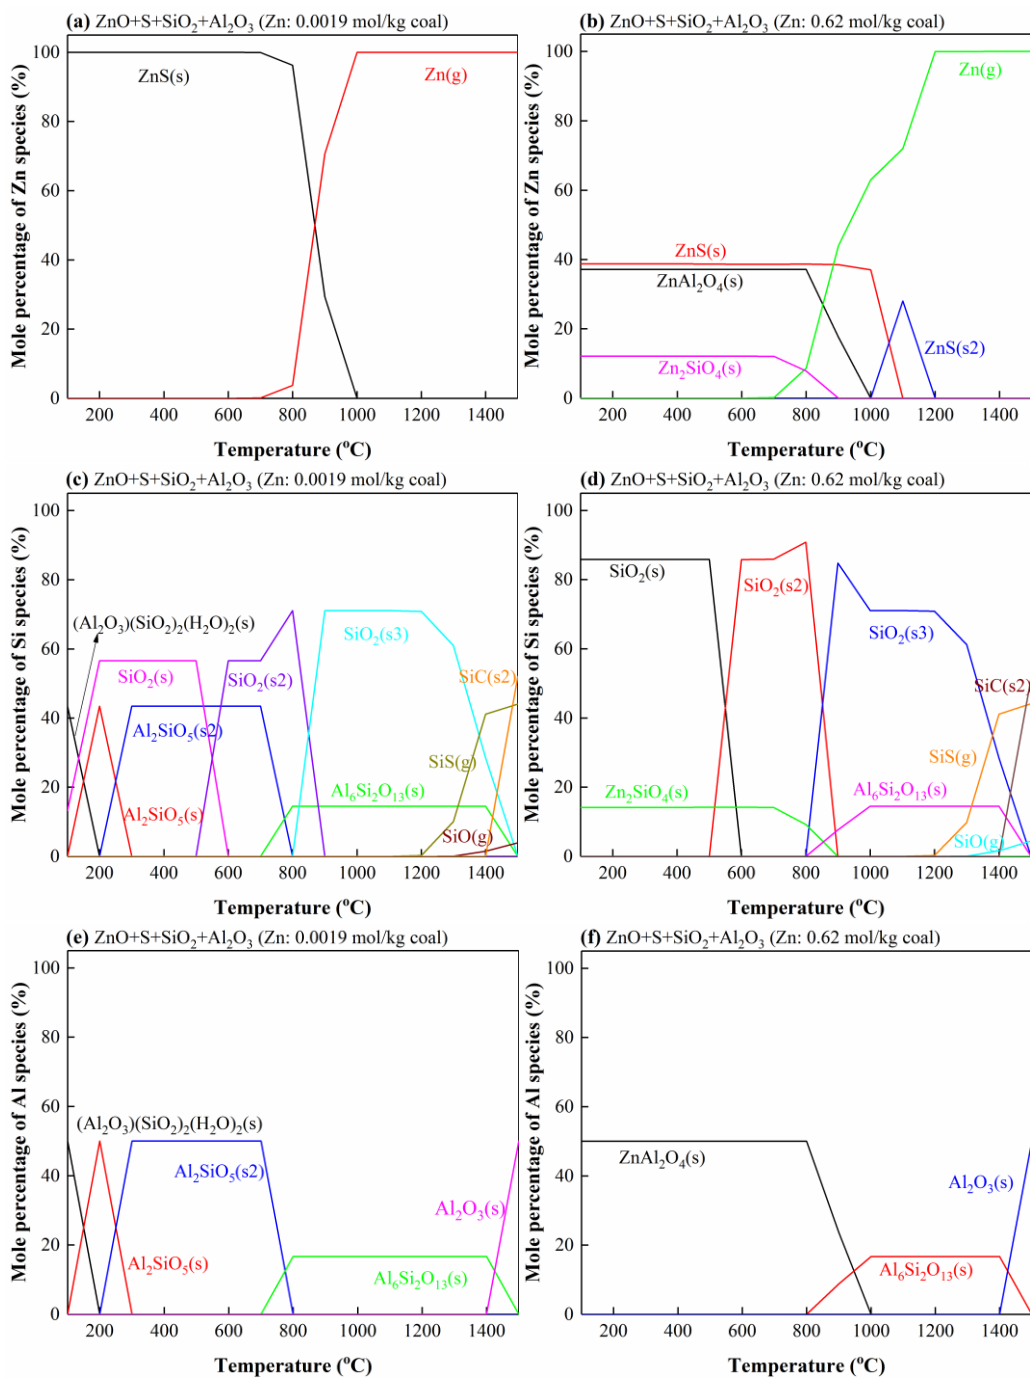

**Figure S5. Thermodynamic equilibrium distributions of zinc (a, b), silicon (c, d) and aluminum (e, f) when sulfur, zinc, silicon and aluminum coexist in the system.**

**Table S2. Standard Gibbs free energies of typical reactions.**

| Reactions                                                                                                                                   | The standard-state Gibbs free energy varied<br>with temperature                                                                                                 |
|---------------------------------------------------------------------------------------------------------------------------------------------|-----------------------------------------------------------------------------------------------------------------------------------------------------------------|
| $\text{ZnO} + \text{C} \rightarrow \text{Zn(g)} + \text{CO(g)}$ (1)                                                                         | $\Delta_r G_m^\theta = 281454.29 - 294.35 \text{ t (100-1500 } ^\circ\text{C)}$                                                                                 |
| $\text{CaO} + \text{ZnS} + \text{C} \rightarrow \text{CaS} + \text{Zn(g)} + \text{CO(g)}$ (2)                                               | $\Delta_r G_m^\theta = 294978.77 - 294.86 \text{ t (100-1500 } ^\circ\text{C)}$                                                                                 |
| $\text{ZnO} + \text{Fe}_2\text{O}_3 \rightarrow \text{ZnFe}_2\text{O}_4$ (3)                                                                | $\Delta_r G_m^\theta = -3858.45 - 10.17 \text{ t (100-600 } ^\circ\text{C)}$<br>$\Delta_r G_m^\theta = -11292.38 + 2.5442 \text{ t (700-1500 } ^\circ\text{C)}$ |
| $2\text{ZnO} + \text{SiO}_2 \rightarrow \text{Zn}_2\text{SiO}_4$ (4)                                                                        | $\Delta_r G_m^\theta = -33008.05 + 6.12 \text{ t (100-1500 } ^\circ\text{C)}$                                                                                   |
| $\text{Zn}_2\text{SiO}_4 + 2\text{C} \rightarrow \text{SiO}_2 + 2\text{Zn(g)} + 2\text{CO(g)}$ (5)                                          | $\Delta_r G_m^\theta = 595916.63 - 594.82 \text{ t (100-1500 } ^\circ\text{C)}$                                                                                 |
| $\text{SiO}_2 + \text{C} \rightarrow \text{SiO(g)} + \text{CO(g)}$ (6)                                                                      | $\Delta_r G_m^\theta = 594968.48 - 343.75 \text{ t (100-1500 } ^\circ\text{C)}$                                                                                 |
| $\text{SiO}_2 + 3\text{C} \rightarrow \text{SiC} + 2\text{CO(g)}$ (7)                                                                       | $\Delta_r G_m^\theta = 515358.30 - 342.19 \text{ t (100-1500 } ^\circ\text{C)}$                                                                                 |
| $\text{SiO}_2 + \text{S} + 2\text{C} \rightarrow \text{SiS(g)} + 2\text{CO(g)}$ (8)                                                         | $\Delta_r G_m^\theta = 638087.82 - 491.71 \text{ t (100-1500 } ^\circ\text{C)}$                                                                                 |
| $\text{ZnO} + \text{Al}_2\text{O}_3 \rightarrow \text{ZnAl}_2\text{O}_4$ (9)                                                                | $\Delta_r G_m^\theta = -43183.7 + 6.60 \text{ t (100-1500 } ^\circ\text{C)}$                                                                                    |
| $\text{ZnAl}_2\text{O}_4 + \text{C} \rightarrow \text{Al}_2\text{O}_3 + \text{Zn(g)} + \text{CO(g)}$ (10)                                   | $\Delta_r G_m^\theta = 324638 - 300.92 \text{ t (100-1500 } ^\circ\text{C)}$                                                                                    |
| $3\text{Al}_2\text{SiO}_5 \rightarrow \text{Al}_6\text{Si}_2\text{O}_{13} + \text{SiO}_2$ (11)                                              | $\Delta_r G_m^\theta = 32981.22 - 40.17 \text{ t (100-1500 } ^\circ\text{C)}$                                                                                   |
| $\text{Al}_6\text{Si}_2\text{O}_{13} + 6\text{C} \rightarrow 3\text{Al}_2\text{O}_3 + 2\text{SiC} + 4\text{CO(g)}$ (12)                     | $\Delta_r G_m^\theta = 1015057.38 - 653.98 \text{ t (100-1500 } ^\circ\text{C)}$                                                                                |
| $3\text{ZnAl}_2\text{O}_4 + 2\text{SiO}_2 + 3\text{C} \rightarrow \text{Al}_6\text{Si}_2\text{O}_{13} + 3\text{Zn(g)} + 3\text{CO(g)}$ (13) | $\Delta_r G_m^\theta = 989573.27 - 933.14 \text{ t (100-1500 } ^\circ\text{C)}$                                                                                 |



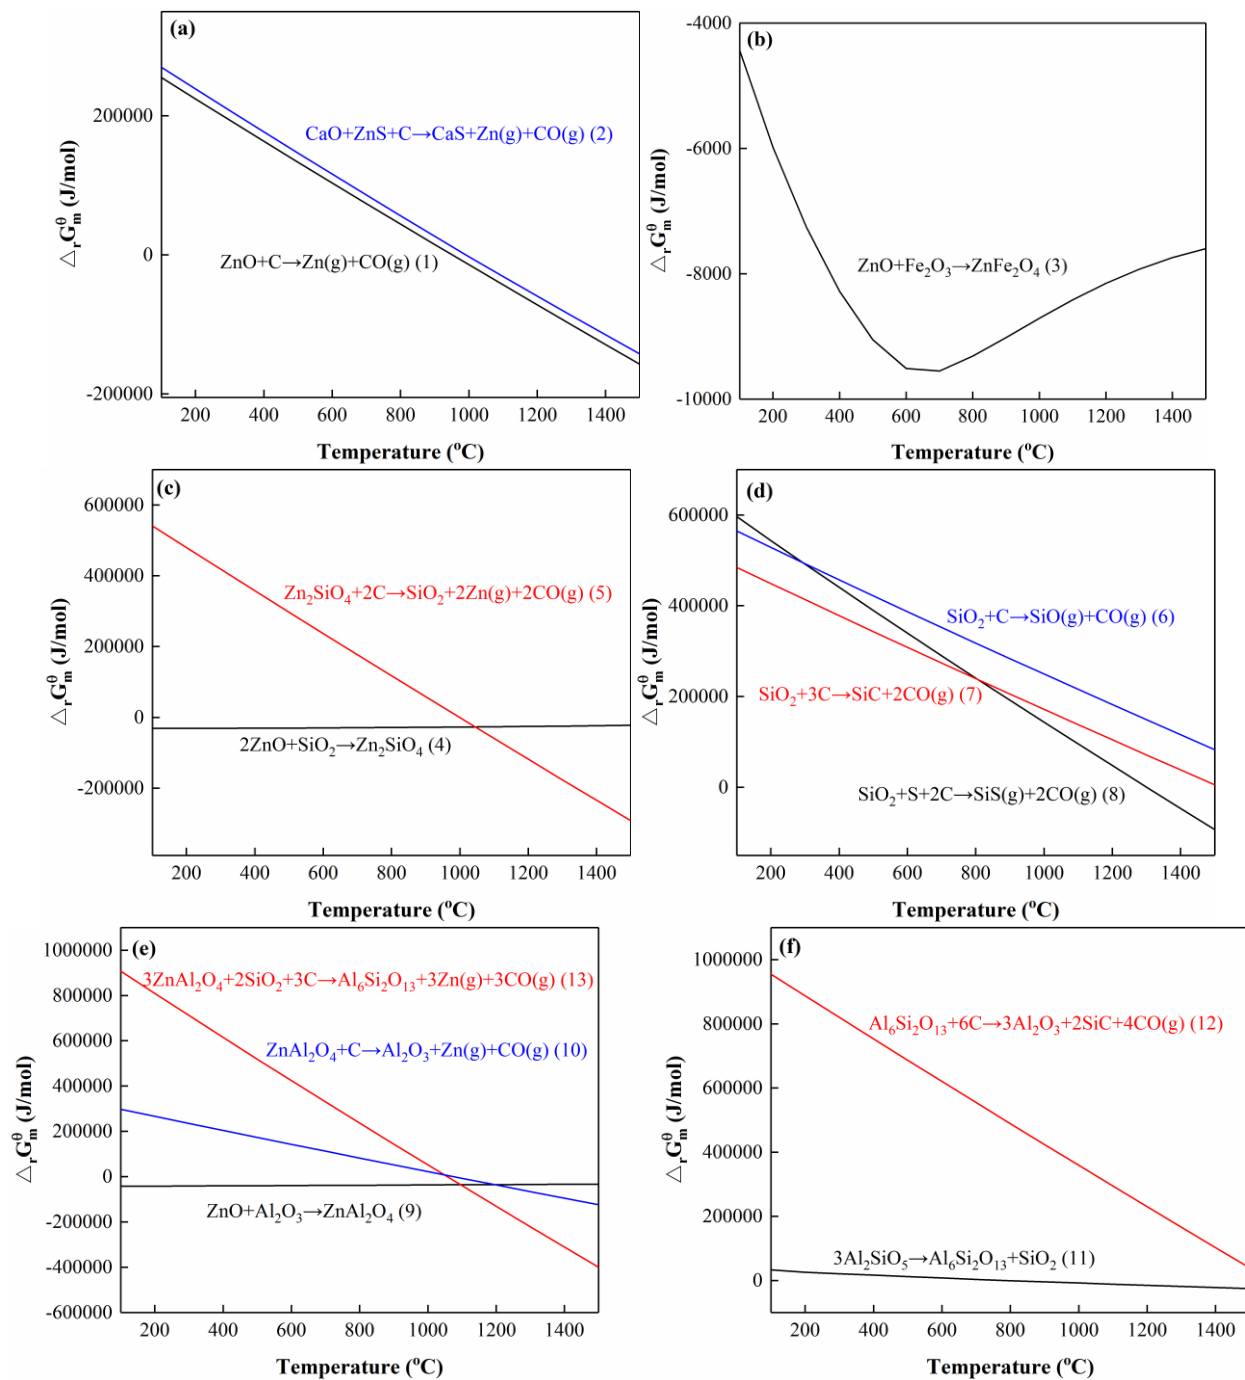

**Figure S6. The standard-state Gibbs free energies of reactions 1-13 as a function of temperature.**

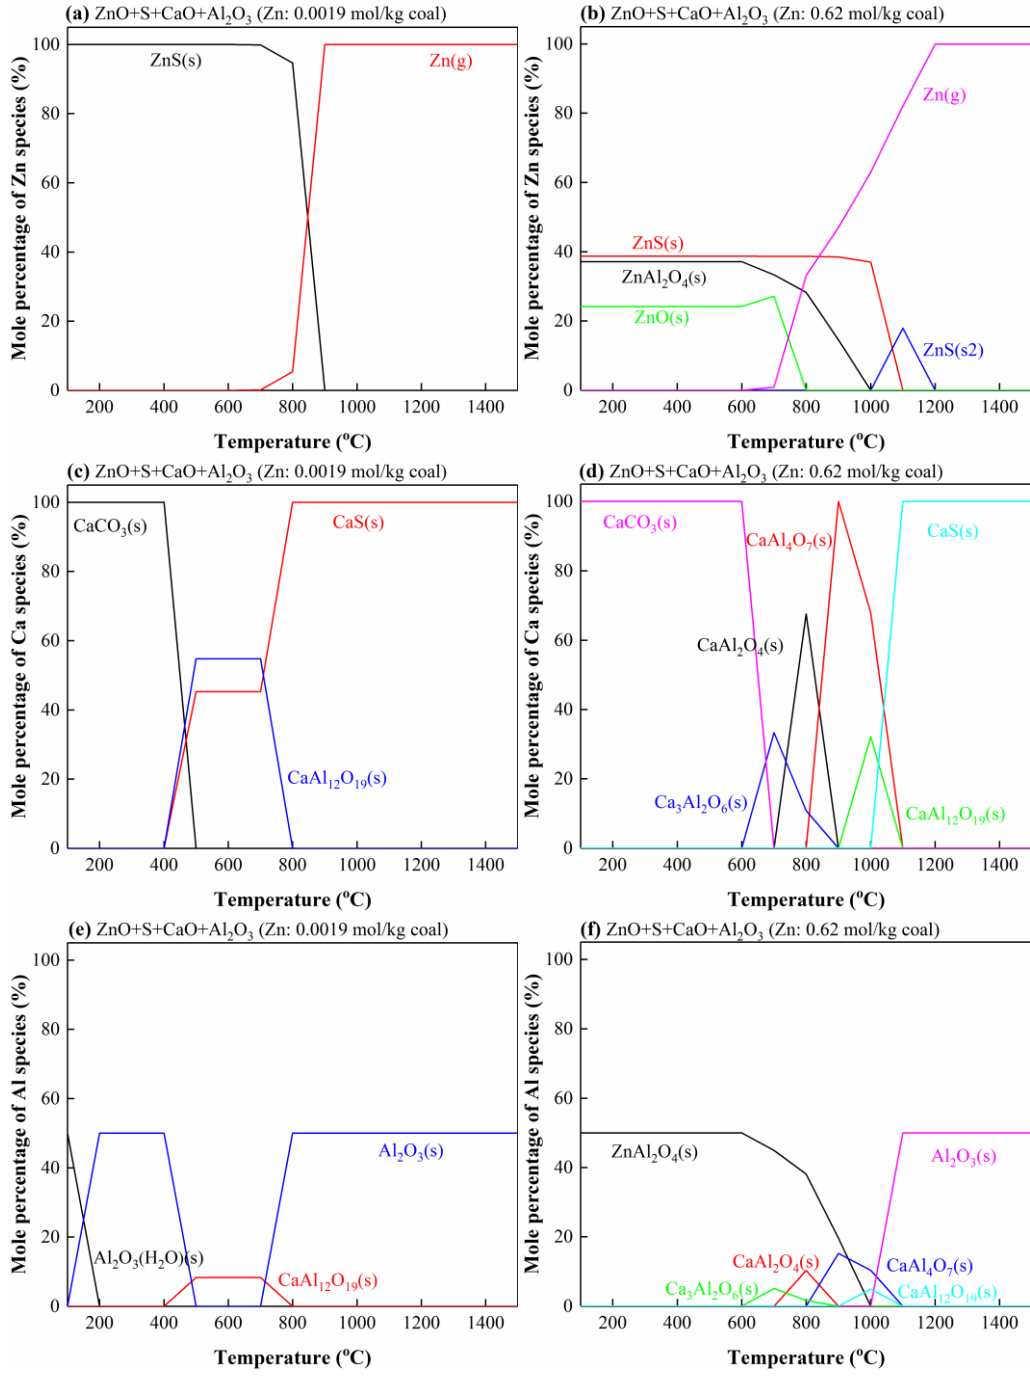

**Figure S7. Thermodynamic equilibrium distributions of zinc (a, b), calcium (c, d) and aluminum (e, f) when sulfur, zinc, calcium and aluminum coexist in the system.**

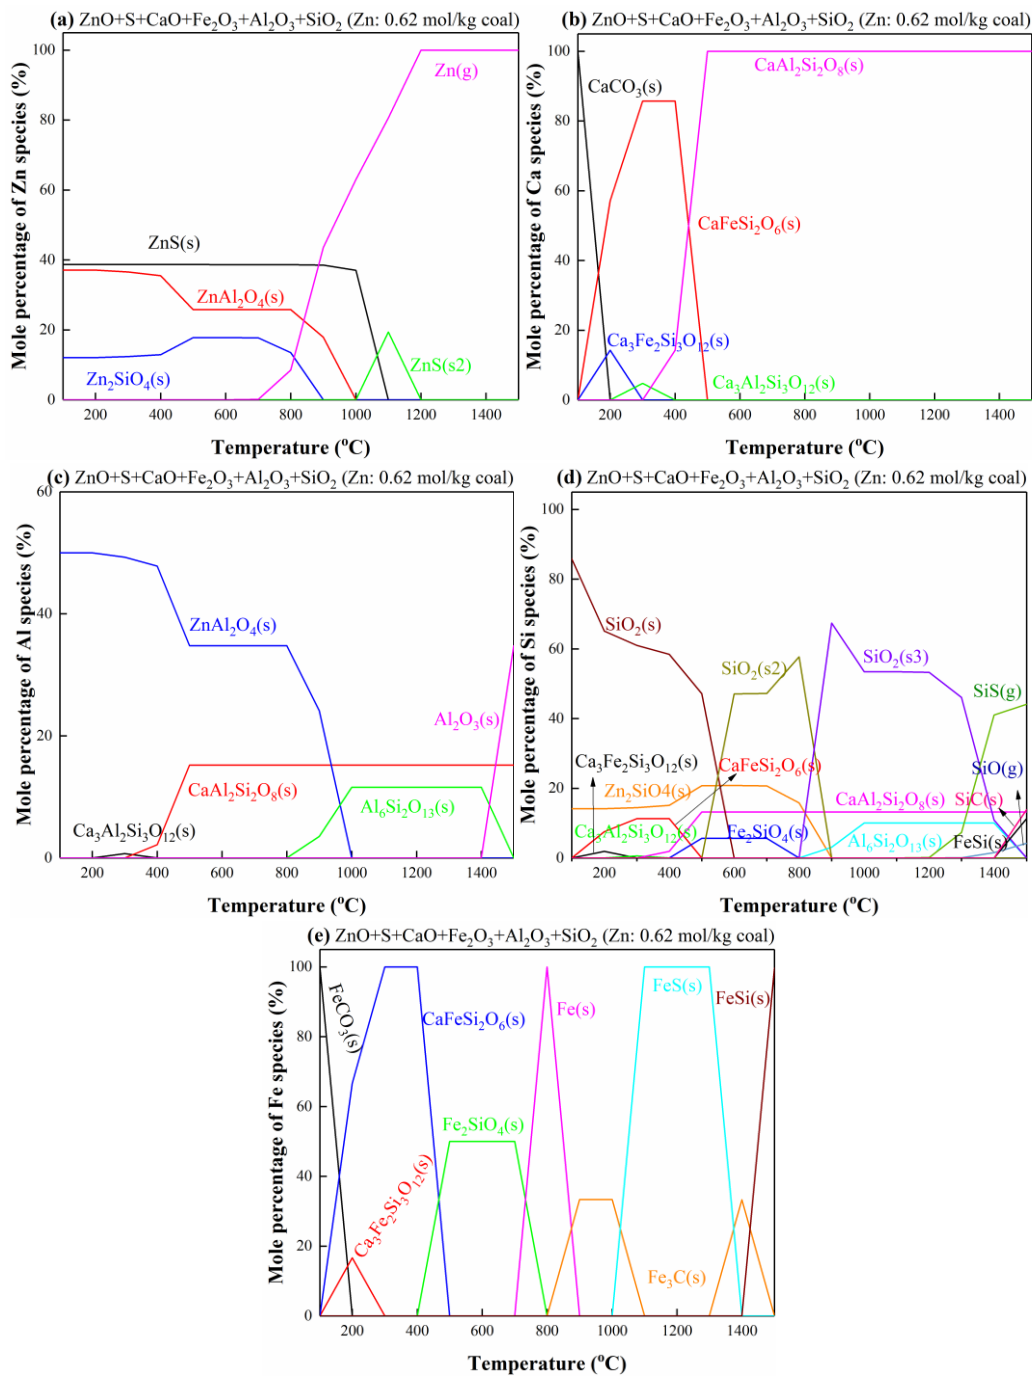

**Figure S8.** Thermodynamic equilibrium distributions of Zn (a), Ca (b), Al (c), Si (d) and Fe (e) in the coal when the Zn content is high (Zn/S/Ca/Al/Si/Fe =0.62/0.24/0.07/0.46/0.53/0.06).
